# Supplementary material for: The copper transporter CTR1 and cisplatin accumulation at the single-cell level by LA-ICP-TOFMS
Source: Frontiers journal article supplement (doi:10.3389/fmolb.2022.1055356), 2022-11-28
Supplement: Data_Sheet_1.pdf [file Data_Sheet_1.pdf]

## *Supplementary Material*

### 1 Supplementary tables

**Supplementary Table S1.** Instrumental parameters for LA-ICP-TOFMS measurements.

|                                           | Standard mode                            | H <sub>2</sub> /He gas mode              |
|-------------------------------------------|------------------------------------------|------------------------------------------|
| RF Power [W]                              | 1440                                     | 1440                                     |
| Sampling depth [mm]                       | 3.5                                      | 3.4                                      |
| Cone materials                            | Ni                                       | Ni                                       |
| Plasma gas flow [L min <sup>-1</sup> ]    | 14                                       | 14                                       |
| Auxiliary gas flow [L min <sup>-1</sup> ] | 0.80                                     | 0.80                                     |
| Nebulizer gas flow [L min <sup>-1</sup> ] | 1.03                                     | 1.03                                     |
| CCT1 flow rate [mL min <sup>-1</sup> ]    | -                                        | 4.2                                      |
| Sample introduction system                | Aerosol rapid introduction system (ARIS) | Aerosol rapid introduction system (ARIS) |
| m/z range                                 | 14-256                                   | 14-256                                   |

## 2 Supplementary Figures

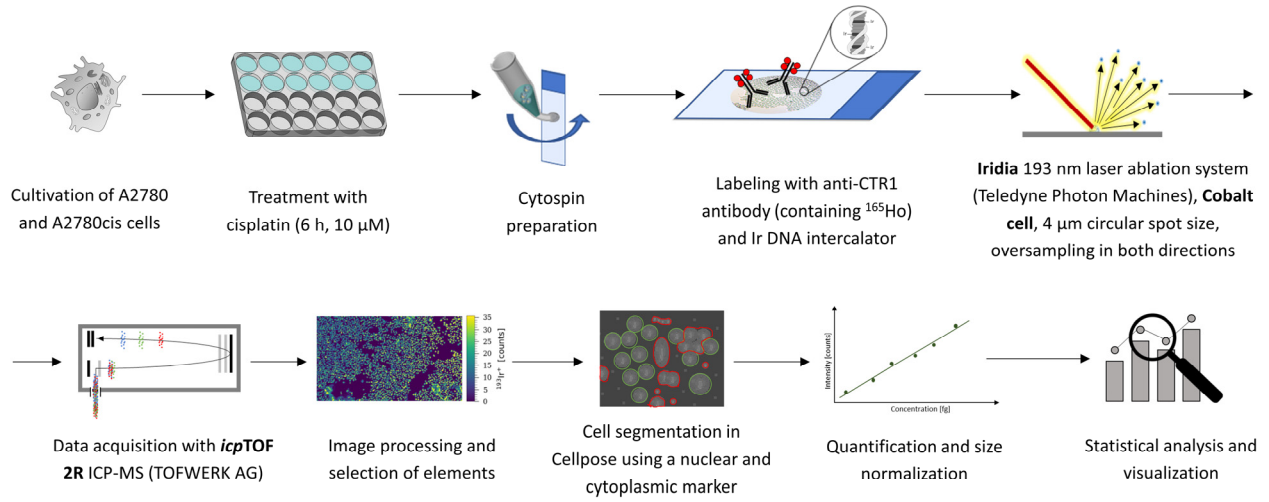

**Supplementary Figure S1.** Scheme of the methodology.

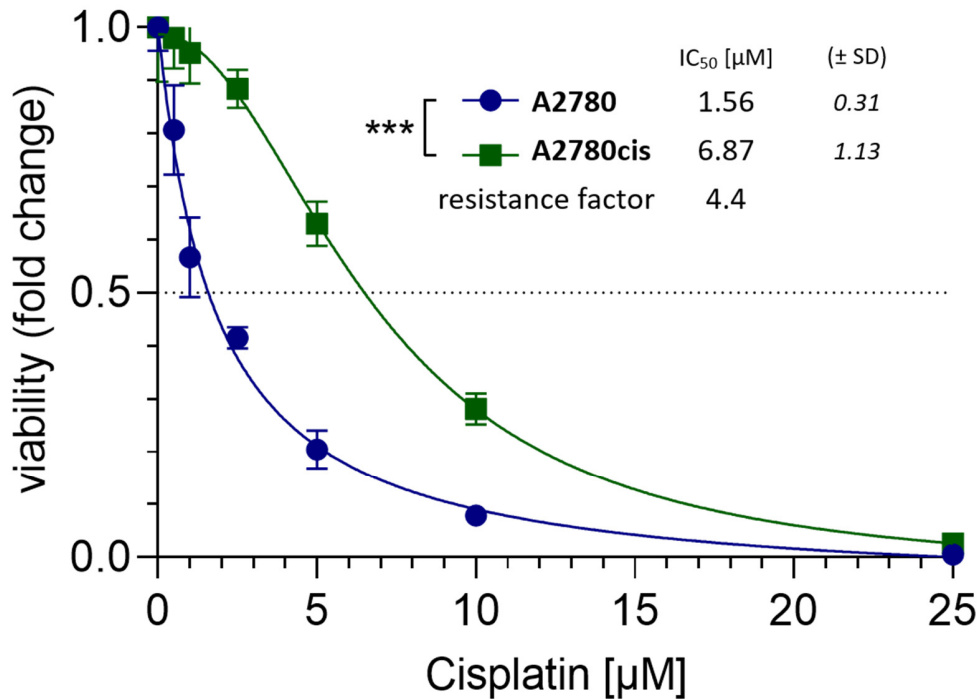

**Supplementary Figure S2.** Impact of cisplatin on cell viability of A2780 and A2780cis cells. Cells were continuously exposed to the indicated concentrations of cisplatin for 72 h and cell viability was determined using an MTT-based cytotoxicity assay. Data points are depicted as mean ± SD of four independent experiments. A two-way ANOVA was performed for statistical analysis. IC<sub>50</sub> values were derived from dose-response curves using the four parameter non-linear regression model. Resistance factor was calculated by dividing the mean IC<sub>50</sub> value of resistant A2780cis by the one of parental A2780 cells.

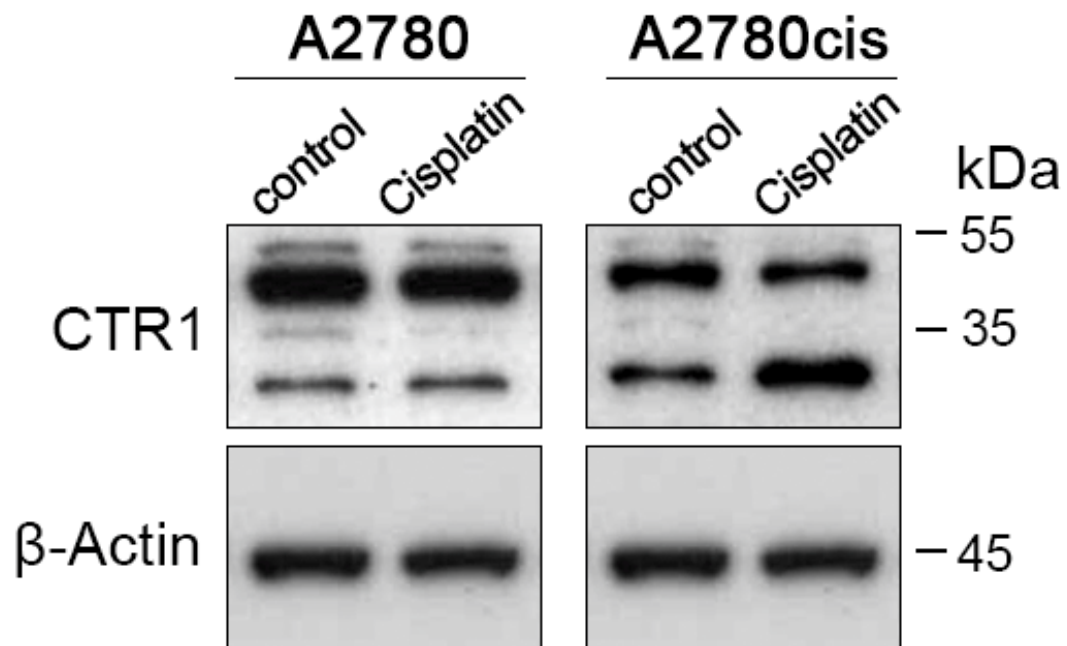

**Supplementary Figure S3.** Western blot of total CTR1 in A2780 and A2780cis with and without prior exposure to cisplatin for 6 h. The bands indicate high-molecular weight mature CTR1, non-glycosylated precursor CTR1 and lower-molecular weight truncated CTR1.

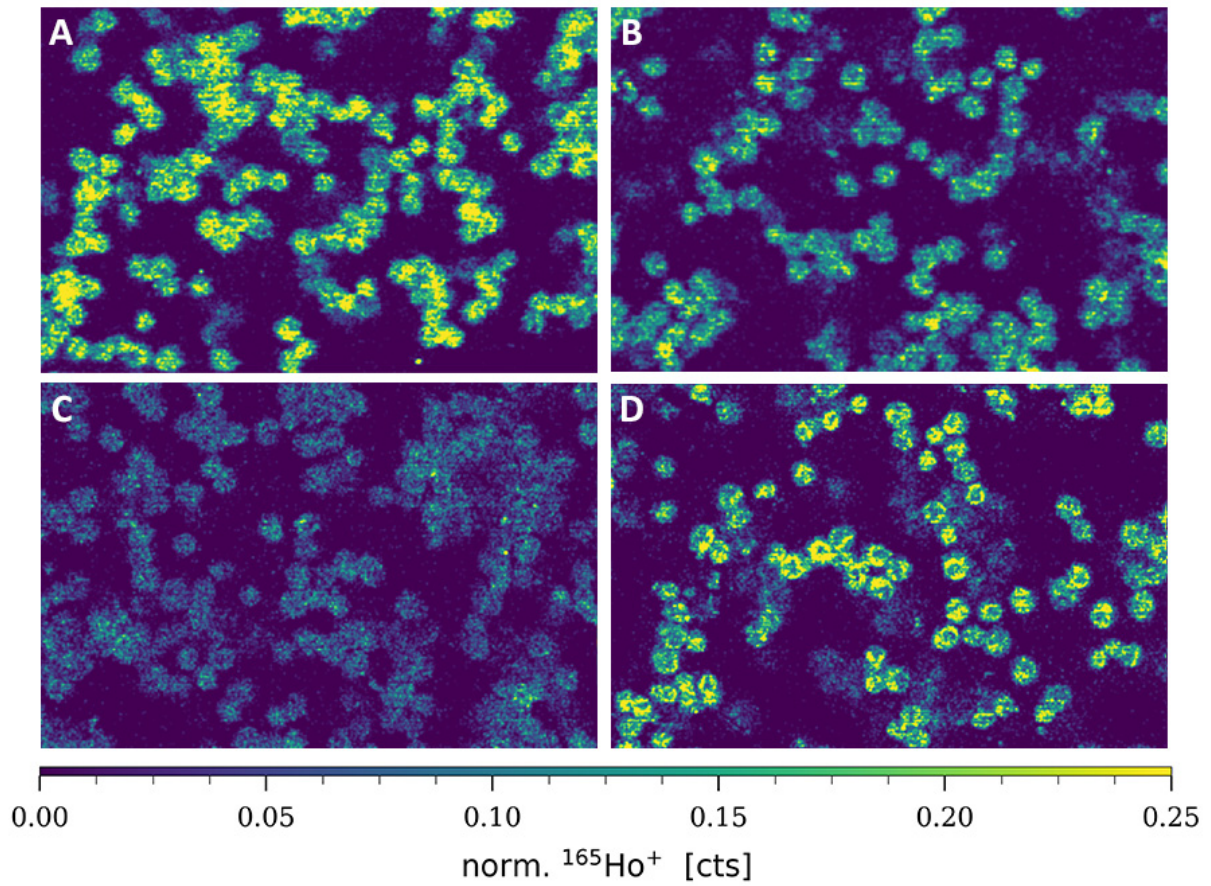

**Supplementary Figure S4.** Signal intensity maps of  $^{165}\text{Ho}$  cell $^{-1}$ , showing normalized total CTR1 levels in (A) A2780 and (B) A2780cis or plasma membrane CTR1 levels in (C) A2780 and (D) A2780cis following treatment with 10  $\mu\text{M}$  cisplatin for 6 h. Cytospin samples were measured by LA-ICP-TOFMS imaging at the single-cell level.
